# Supplementary material for: A Randomized, Double-Blind, Placebo-Controlled Trial of Vilazodone in Children and Adolescents with Major Depressive Disorder with Twenty-Six-Week Open-Label Follow-Up
Source: PubMed Central journal article supplement — J Child Adolesc Psychopharmacol. 2020 Jul 29;30(6):355–65. doi: 10.1089/cap.2019.0176 (PMC7409584; doi:10.1089/cap.2019.0176), 2020-07-29
Supplement: Supp_FigS1.pdf [file Supp_FigS1.pdf]

## Supplementary Data

### Randomized, controlled trial study design

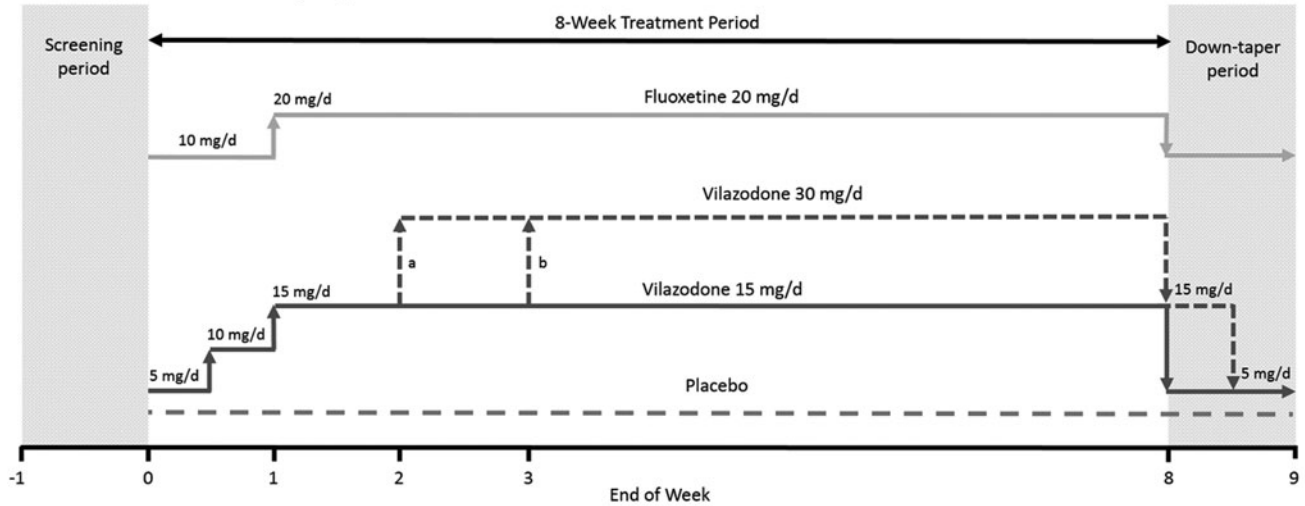

### Open-label extension study design

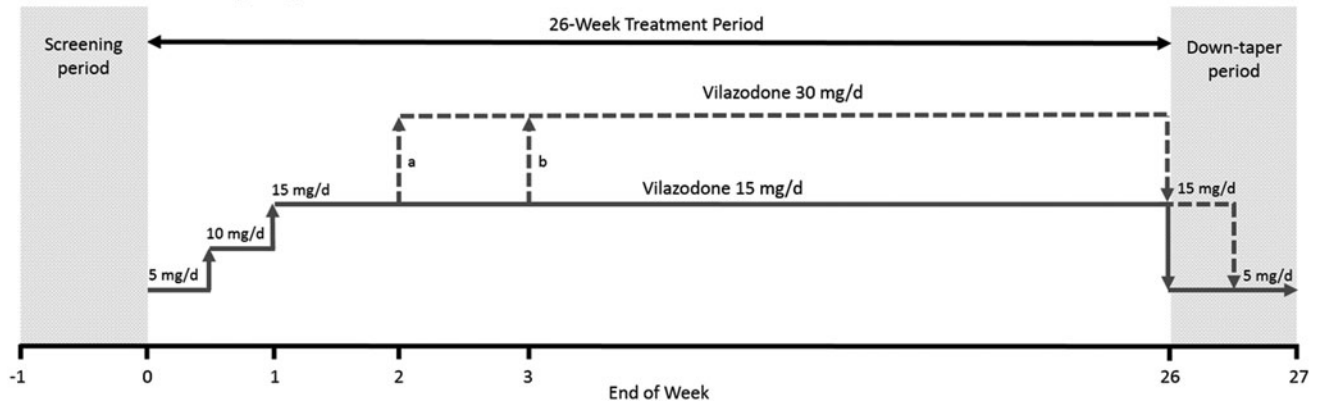

**SUPPLEMENTARY FIG. S1.** Study designs. <sup>a</sup>Based on the patient's therapeutic response and tolerability, dose could be increased to 30 mg/day by the end of week 2 or at the end of week 3. <sup>b</sup>No further dose increases were allowed beyond week 3. A single reduction to 15 mg/day was allowed for tolerability in patients taking vilazodone 30 mg/day.
